# Supplementary material for: Enzyme degradable star polymethacrylate/silica hybrid inks for 3D printing of tissue scaffolds
Source: Royal Society of Chemistry journal article supplement (doi:10.1039/d0ma00674b), 2020-01-01
Supplement: d0ma00674b1.pdf [file d0ma00674b1.pdf]

## Enzyme degradable star polymethacrylate/silica hybrid inks for 3D printing of tissue scaffolds

<sup>1,2</sup> Anna Li Volsi, <sup>2</sup>Francesca Tallia, <sup>2</sup>Haffsah Iqbal, <sup>2</sup>Theoni K. Georgiou, <sup>2</sup>Julian R. Jones

<sup>1</sup>Department of Chemical Engineering, Imperial College London, SW7 2AZ London, UK

<sup>2</sup>Department of Materials, Imperial College London, SW7 2AZ London, UK

\*Corresponding author: julian.r.jones@imperial.ac.uk

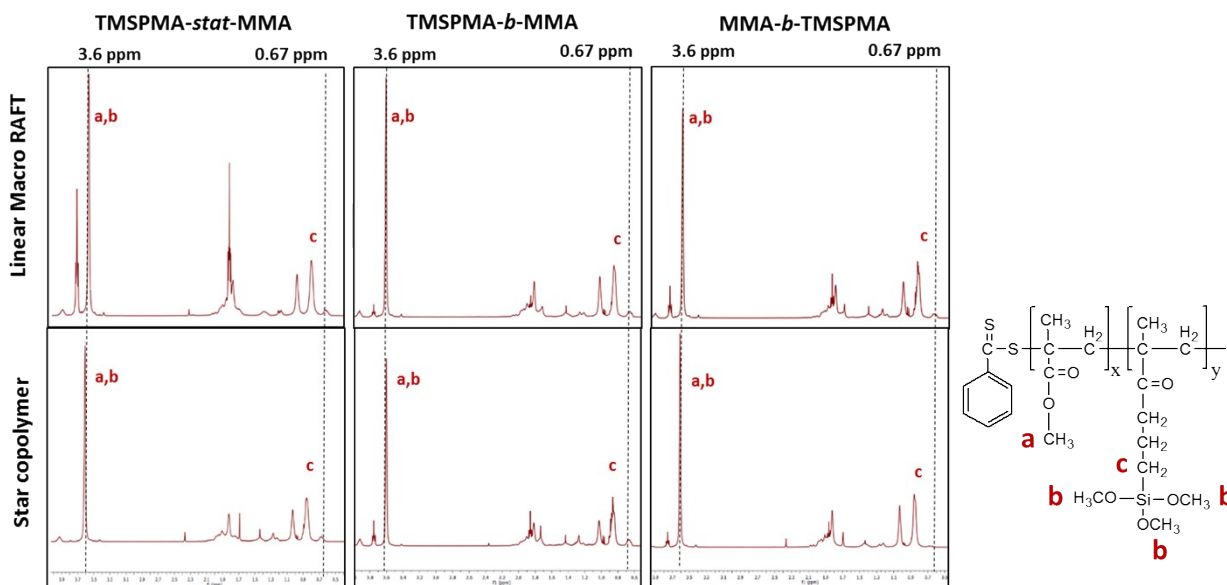

**Figure S1.** <sup>1</sup>H NMR characterization of poly(MMA-*b*-TMSPMA), poly(TMSPMA-*b*-MMA) and poly(MMA-*stat*-TMSPMA) linear arms (top spectra) and corresponding star copolymers (bottom spectra). The comparison of the peaks at 3.6 ppm (methoxy group, a&b) and 0.67 ppm (Si-CH<sub>2</sub>-, c) confirmed that the molar ratios were close to our targeted value (9 mol % of TMSPMA).

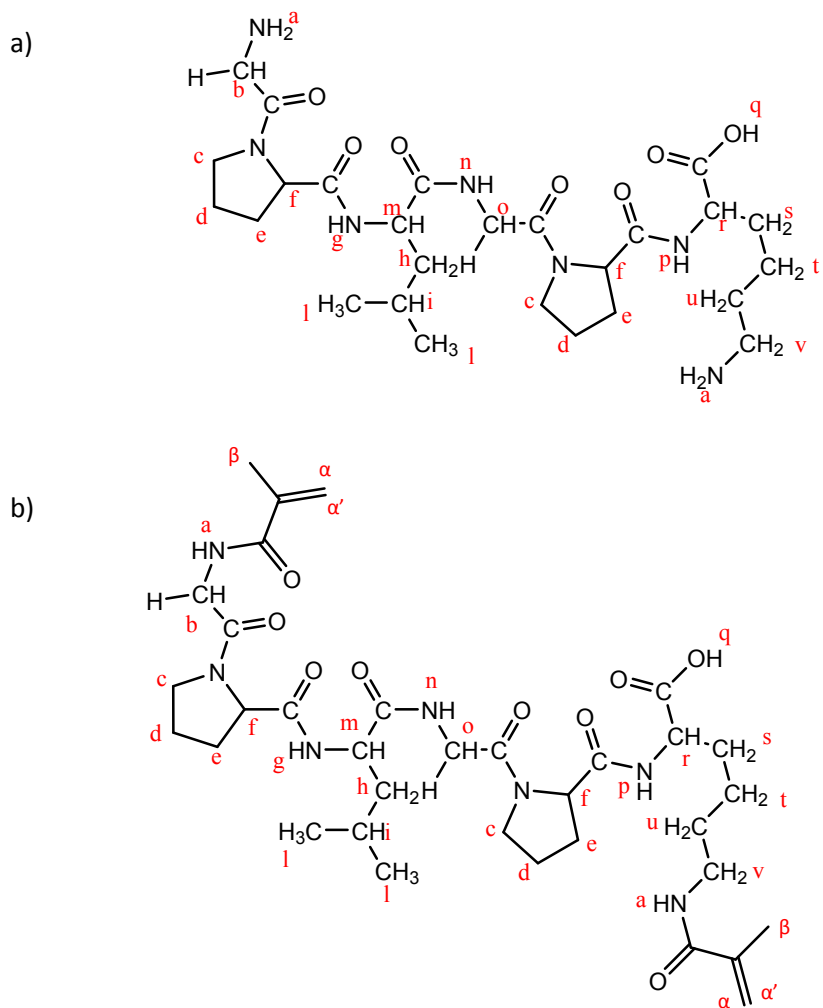

**Scheme S1.** Chemical structures of: (a) the starting di-amino ended peptide ({GLY}{PRO}{LEU}{GLY}{PRO}{LYS}); and (b) MaCh-peptide.

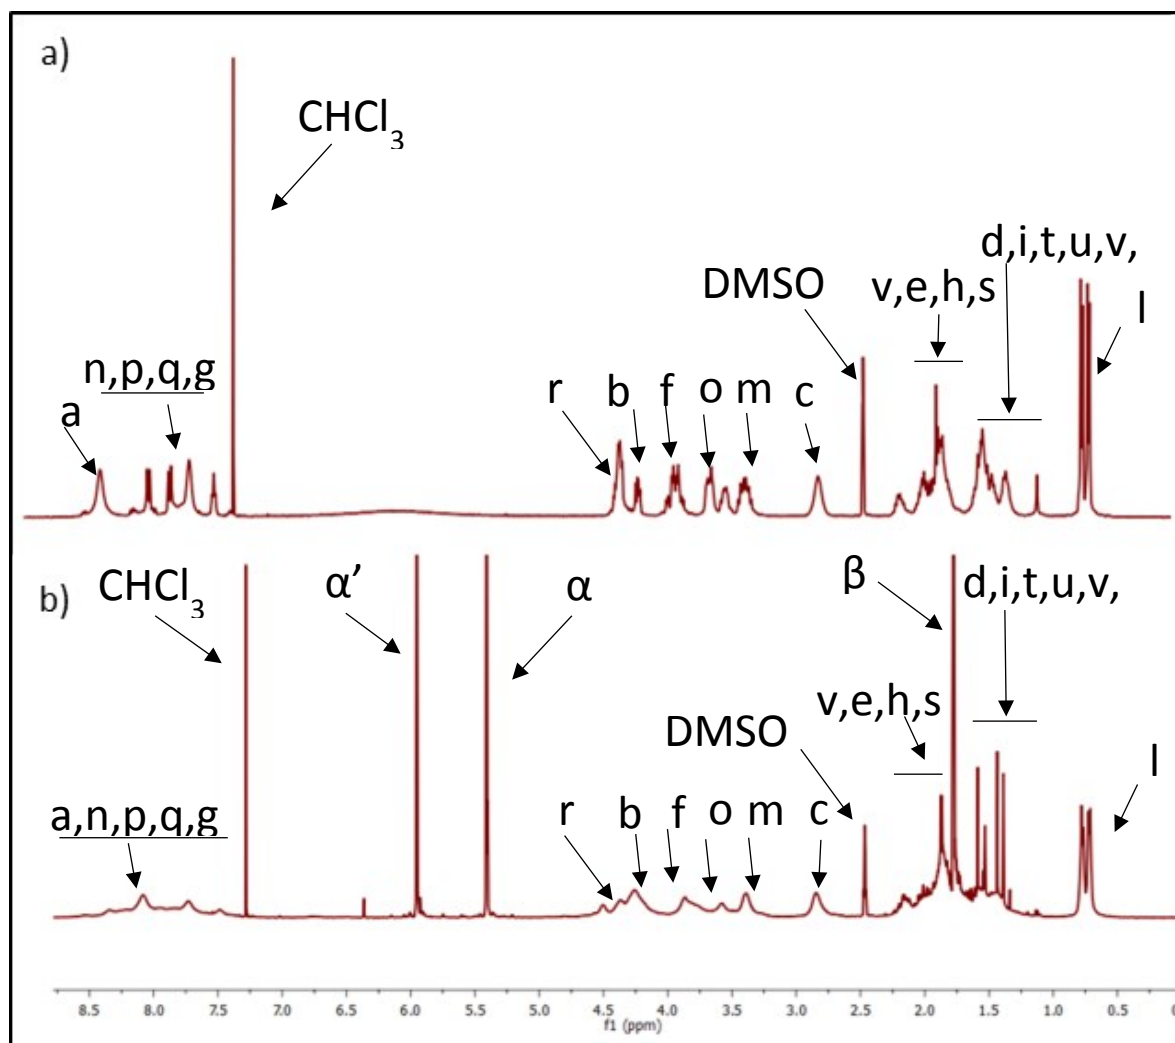

**Figure S2.**  $^1\text{H}$  NMR spectra of starting peptide (a) in  $\text{CDCl}_3/\text{DMSO}$  and of MaCh-peptide (b) in  $\text{CDCl}_3$ .
